# Supplementary material for: LINC00958 and HOXC13-AS as key candidate biomarkers in head and neck squamous cell carcinoma by integrated bioinformatics analysis
Source: PeerJ. 2020 Feb 13;8:e8557. doi: 10.7717/peerj.8557 (PMC7024572; doi:10.7717/peerj.8557)
Supplement: Data S1 — We used qPCR to validate the RNAs that had been screened by bioinformatic analysis. [file peerj-08-8557-s001.xls]

## Sheet: Sheet1
													The expression level of NPEC2 bmi-1 was used as control
The name of long non-coding RNAs	The name of cell lines	The value of CT , N=3			△CT, N=3			2^-△CT, N=3			average	SD	average	SD
LINC0095	NPEC2-Bmi-1	28.311	28.271	28.098	5.515	5.525	5.336	0.0218685	0.0217175	0.0247573	0.0227811	0.00171313	1	0.0751994
	HONE1	20.855	20.766	21.364	-1.222	-1.58	-1.052	2.3327	2.9897	2.0734	2.46527	0.472314	108.215	20.7327
	SUNE2	20.221	20.544	20.215	-1.031	-0.775999	-0.9	2.04344	1.71238	1.86607	1.87396	0.165674	82.2594	7.27241
	SUNE1	21.336	21.18	21.181	0.688	0.51	0.619999	0.620714	0.702222	0.650671	0.657869	0.0412282	28.8778	1.80975
	6-10B	20.943	20.94	20.842	0.462	0.451	0.4	0.725979	0.731536	0.757858	0.738458	0.0170297	32.4154	0.747535
	CNE2	20.392	20.427	20.394	-0.610001	-0.261999	-0.359001	1.52626	1.19914	1.28254	1.33598	0.169982	58.6442	7.46154
	5-8F	22.204	22.058	22.241	-2.58	-2.661	-2.501	5.9794	6.32471	5.66078	5.9883	0.332053	262.862	14.5758
								1	1	1	1	0
The name of long non-coding RNAs	The name of cell lines	The value of CT , N=3
HOXC13	NPEC2-Bmi-1	31	31.499	29.07	8.204	8.753	6.308	0.00339117	0.00231784	0.0126213	0.00611009	0.00566432	1	0.927043
	HONE1	25.638	26.179	26.074	3.561	3.833	3.658	0.084729	0.0701701	0.0792196	0.0780395	0.00735083	12.7722	1.20306
	SUNE2	26.49	26.45	26.307	5.238	5.13	5.192	0.0264975	0.0285572	0.027356	0.0274702	0.00103459	4.49588	0.169325
	SUNE1	24.794	25.954	24.708	4.146	5.284	4.147	0.0564845	0.025666	0.0564454	0.0461986	0.0177818	7.56104	2.91024
	6-10B	26.344	26.41	26.353	5.863	5.921	5.911	0.0171815	0.0165045	0.0166192	0.0167684	0.000362333	2.74438	0.0593008
	CNE2	26.74	26.647	26.701	5.738	5.958	5.948	0.0187366	0.0160866	0.0161985	0.0170072	0.00149873	2.78346	0.245288
	5-8F	24.666	24.821	24.942	-0.118	0.101999	0.199999	1.08523	0.931741	0.870551	0.962507	0.110597	157.527	18.1006
the housekeeping gene GAPDH	The name of cell lines	The value of CT , N=3
GAPDH	NPEC2-Bmi-1	22.796	22.746	22.762
	HONE1	22.077	22.346	22.416
	SUNE2	21.252	21.32	21.115
	SUNE1	20.648	20.67	20.561
	6-10B	20.481	20.489	20.442
	CNE2	21.002	20.689	20.753
	5-8F	24.784	24.719	24.742
